# Supplementary material
Source: bioRxiv or medRxiv preprint supplement (https://www.biorxiv.org/highwire/filestream/15461/field_highwire_adjunct_files/0/055848-1.pdf)
Supplement: Supplementary file [file 055848-1.pdf]

**Table S1.**

| Tested Population                          | Location   | Drainage Basin   | Coordinates |             |
|--------------------------------------------|------------|------------------|-------------|-------------|
|                                            |            |                  | North       | West        |
| San Marcos (C101)                          | Texas, USA | Guadalupe River  | 29°51'25.83 | 97°53'47.96 |
| Comal Spring                               | Texas, USA | Guadalupe River  | 29°42'46.82 | 98°8'8.25   |
| Weslaco                                    | Texas, USA | Río Grande       | 26°7'14.52  | 97°57'41.44 |
| Río Purificación,<br>Barretal (III/9)      | Mexico     | Río Pánuco       | 24°4'42.85  | 99°7'21.76  |
| Río Purificación,<br>Nuevo Padilla (VI/17) | Mexico     | Río Pánuco       | 24°02'35.59 | 98°54'15.98 |
| San Ignacio                                | Mexico     | Río San Fernando | 24°51'53.2  | 99°20'02.7  |

**Table S1. Population origins.** This table shows the test population origins across the range of *P. formosa*, indicating the location, drainage basin and the coordinates of the original population collection site). There were 2 populations from the northern range (San Marcos (C101) and Comal Spring), 2 populations from the midpoint (Weslaco and San Ignacio), and 2 populations from the southern range (Río Purificación, Barretal (III/9) and Río Purificación, Nuevo Padilla (VI/17). Note: the populations sampled covered the span of the geographical distribution of *P. formosa*.

**Table S2.**

| Locus                                  | Characteristics in <i>Poecilia formosa</i> |          |            |             |       |       |          |          |
|----------------------------------------|--------------------------------------------|----------|------------|-------------|-------|-------|----------|----------|
|                                        | Population                                 | <i>n</i> | Allele No. | Allele size | $H_O$ | $H_E$ | <i>P</i> | $F_{ST}$ |
| <b>GA-II41</b><br>Genbank#<br>AJ810469 | Co101                                      | 5        | 2          | 118 - 126   | 0.800 | 0.533 | 0.429    | 0.083    |
|                                        | 3VI/17                                     | 11       | 2          | 118 - 126   | 1.000 | 0.524 | 0.003    |          |
|                                        | 4III/9                                     | 12       | 2          | 118 - 126   | 1.000 | 0.522 | 0.002    |          |
|                                        | W5-Weslaco                                 | 7        | 2          | 118 - 126   | 1.000 | 0.538 | 0.037    |          |
|                                        | 6SI-SanIgnacio                             | 5        | 2          | 118 - 126   | 1.000 | 0.556 | 0.126    |          |
|                                        | 7aCS-7aComalSpring                         | 11       | 2          | 118 - 126   | 1.000 | 0.524 | 0.003    |          |
|                                        | 8bCS-8bComalSpring                         | 11       | 2          | 118 - 126   | 1.000 | 0.524 | 0.003    |          |
| <b>GA-I47A</b><br>Genbank#<br>AJ810468 | Co101                                      | 4        | 2          | 133 - 155   | 1.000 | 0.571 | 0.314    | 0.240    |
|                                        | 3VI/17                                     | 11       | 2          | 133 - 155   | 1.000 | 0.524 | 0.003    |          |
|                                        | 4III/9                                     | 12       | 2          | 133 - 155   | 1.000 | 0.522 | 0.002    |          |
|                                        | W5-Weslaco                                 | 7        | 2          | 133 - 159   | 1.000 | 0.538 | 0.037    |          |
|                                        | 6SI-SanIgnacio                             | 5        | 2          | 133 - 155   | 1.000 | 0.556 | 0.128    |          |
|                                        | 7aCS-7aComalSpring                         | 11       | 2          | 133 - 155   | 1.000 | 0.524 | 0.003    |          |
|                                        | 8bCS-8bComalSpring                         | 11       | 2          | 133 - 155   | 1.000 | 0.524 | 0.003    |          |
| <b>GT-II33</b><br>Genbank#<br>AJ810474 | Co101                                      | 5        | 2          | 178 - 182   | 0.800 | 0.533 | 0.429    | 0.397    |
|                                        | 3VI/17                                     | 11       | 1          | 182         | 0.000 | 0.000 | -        |          |
|                                        | 4III/9                                     | 12       | 1          | 182         | 0.000 | 0.000 | -        |          |
|                                        | W5-Weslaco                                 | 7        | 1          | 182         | 0.000 | 0.000 | -        |          |
|                                        | 6SI-SanIgnacio                             | 5        | 1          | 182         | 0.000 | 0.000 | -        |          |
|                                        | 7aCS-7aComalSpring                         | 11       | 1          | 182         | 0.000 | 0.000 | -        |          |
|                                        | 8bCS-8bComalSpring                         | 11       | 2          | 178 - 182   | 1.000 | 0.524 | 0.003    |          |
| <b>GA-V18</b><br>Genbank#<br>AJ810470  | Co101                                      | 5        | 3          | 122 - 148   | 1.000 | 0.644 | 0.176    | 0.221    |
|                                        | 3VI/17                                     | 11       | 2          | 122 - 148   | 1.000 | 0.524 | 0.003    |          |
|                                        | 4III/9                                     | 12       | 2          | 122 - 148   | 1.000 | 0.522 | 0.002    |          |
|                                        | W5-Weslaco                                 | 7        | 2          | 122 - 148   | 1.000 | 0.538 | 0.037    |          |
|                                        | 6SI-SanIgnacio                             | 5        | 2          | 122 - 144   | 1.000 | 0.556 | 0.127    |          |
|                                        | 7aCS-7aComalSpring                         | 11       | 2          | 122 - 144   | 1.000 | 0.524 | 0.003    |          |
|                                        | 8bCS-8bComalSpring                         | 11       | 3          | 122 - 148   | 1.000 | 0.602 | 0.006    |          |
| <b>GA-I26</b><br>Genbank#<br>AJ810456  | Co101                                      | 4        | 2          | 160 - 194   | 1.000 | 0.571 | 0.314    | 0.201    |
|                                        | 3VI/17                                     | 11       | 2          | 160 - 194   | 1.000 | 0.524 | 0.003    |          |
|                                        | 4III/9                                     | 12       | 2          | 160 - 194   | 1.000 | 0.522 | 0.002    |          |
|                                        | W5-Weslaco                                 | 7        | 2          | 160 - 194   | 1.000 | 0.538 | 0.038    |          |
|                                        | 6SI-SanIgnacio                             | 5        | 2          | 160 - 194   | 1.000 | 0.556 | 0.126    |          |
|                                        | 7aCS-7aComalSpring                         | 11       | 2          | 160 - 194   | 1.000 | 0.524 | 0.003    |          |
|                                        | 8bCS-8bComalSpring                         | 11       | 2          | 160 - 194   | 1.000 | 0.524 | 0.003    |          |

|                                                 |                    |    |   |           |       |       |       |       |
|-------------------------------------------------|--------------------|----|---|-----------|-------|-------|-------|-------|
| <b>GA-III28</b><br><b>Genbank#</b><br>AJ810459  | Co101              | 4  | 2 | 215 - 241 | 1.000 | 0.571 | 0.315 | 0.303 |
|                                                 | 3VI/17             | 11 | 2 | 215 - 241 | 1.000 | 0.524 | 0.003 |       |
|                                                 | 4III/9             | 12 | 2 | 215 - 241 | 1.000 | 0.522 | 0.002 |       |
|                                                 | W5-Weslaco         | 7  | 2 | 237 - 241 | 1.000 | 0.538 | 0.038 |       |
|                                                 | 6SI-SanIgnacio     | 5  | 2 | 215 - 241 | 1.000 | 0.556 | 0.126 |       |
|                                                 | 7aCS-7aComalSpring | 11 | 2 | 215 - 241 | 1.000 | 0.524 | 0.003 |       |
|                                                 | 8bCS-8bComalSpring | 11 | 2 | 215 - 241 | 1.000 | 0.524 | 0.003 |       |
| <b>GA-III29B</b><br><b>Genbank#</b><br>AJ810460 | Co101              | 5  | 2 | 255 - 257 | 0.000 | 0.356 | 0.111 | 0.889 |
|                                                 | 3VI/17             | 11 | 2 | 255 - 265 | 0.000 | 0.173 | 0.047 |       |
|                                                 | 4III/9             | 12 | 1 | 255       | 0.083 | 0.083 | 1.000 |       |
|                                                 | W5-Weslaco         | 7  | 1 | 261       | 0.000 | 0.000 | -     |       |
|                                                 | 6SI-SanIgnacio     | 5  | 1 | 257       | 0.000 | 0.000 | -     |       |
|                                                 | 7aCS-7aComalSpring | 11 | 1 | 257       | 0.000 | 0.000 | -     |       |
|                                                 | 8bCS-8bComalSpring | 11 | 1 | 257       | 0.000 | 0.000 | -     |       |
| <b>GT-I41</b><br><b>Genbank#</b><br>AJ810472    | Co101              | 5  | 1 | 148       | 0.000 | 0.000 | -     | -     |
|                                                 | 3VI/17             | 11 | 1 | 148       | 0.000 | 0.000 | -     |       |
|                                                 | 4III/9             | 12 | 1 | 148       | 0.000 | 0.000 | -     |       |
|                                                 | W5-Weslaco         | 7  | 1 | 148       | 0.000 | 0.000 | -     |       |
|                                                 | 6SI-SanIgnacio     | 5  | 1 | 148       | 0.000 | 0.000 | -     |       |
|                                                 | 7aCS-7aComalSpring | 11 | 1 | 148       | 0.000 | 0.000 | -     |       |
|                                                 | 8bCS-8bComalSpring | 11 | 1 | 148       | 0.000 | 0.000 | -     |       |
| <b>GA-IV42</b><br><b>Genbank#</b><br>AJ810462   | Co101              | 5  | 3 | 198 - 204 | 1.000 | 0.644 | 0.175 | 0.316 |
|                                                 | 3VI/17             | 11 | 2 | 198 - 202 | 1.000 | 0.524 | 0.003 |       |
|                                                 | 4III/9             | 12 | 2 | 198 - 202 | 1.000 | 0.522 | 0.002 |       |
|                                                 | W5-Weslaco         | 7  | 2 | 198 - 202 | 1.000 | 0.538 | 0.038 |       |
|                                                 | 6SI-SanIgnacio     | 5  | 2 | 198 - 204 | 1.000 | 0.556 | 0.127 |       |
|                                                 | 7aCS-7aComalSpring | 11 | 2 | 198 - 204 | 1.000 | 0.524 | 0.003 |       |
|                                                 | 8bCS-8bComalSpring | 11 | 2 | 198 - 204 | 1.000 | 0.524 | 0.003 |       |
| <b>GA-I29B</b><br><b>Genbank#</b><br>AJ810458   | Co101              | 4  | 2 | 229 - 255 | 1.000 | 0.571 | 0.314 | 0.228 |
|                                                 | 3VI/17             | 11 | 2 | 229 - 255 | 1.000 | 0.524 | 0.003 |       |
|                                                 | 4III/9             | 12 | 2 | 229 - 255 | 1.000 | 0.522 | 0.002 |       |
|                                                 | W5-Weslaco         | 7  | 2 | 229 - 257 | 1.000 | 0.538 | 0.037 |       |
|                                                 | 6SI-SanIgnacio     | 5  | 2 | 229 - 255 | 1.000 | 0.556 | 0.127 |       |
|                                                 | 7aCS-7aComalSpring | 11 | 2 | 229 - 255 | 1.000 | 0.524 | 0.003 |       |
|                                                 | 8bCS-8bComalSpring | 11 | 2 | 229 - 255 | 1.000 | 0.524 | 0.003 |       |
| <b>GT-II49</b><br><b>Genbank#</b><br>AJ810466   | Co101              | 5  | 2 | 342 - 382 | 1.000 | 0.556 | 0.128 | 0.219 |
|                                                 | 3VI/17             | 11 | 2 | 342 - 382 | 1.000 | 0.524 | 0.003 |       |
|                                                 | 4III/9             | 12 | 2 | 342 - 382 | 1.000 | 0.522 | 0.002 |       |
|                                                 | W5-Weslaco         | 7  | 2 | 342 - 382 | 1.000 | 0.538 | 0.037 |       |
|                                                 | 6SI-SanIgnacio     | 5  | 2 | 342 - 382 | 1.000 | 0.556 | 0.126 |       |

|                          |                    |    |   |           |       |       |       |       |
|--------------------------|--------------------|----|---|-----------|-------|-------|-------|-------|
|                          | 7aCS-7aComalSpring | 11 | 2 | 342 - 382 | 1.000 | 0.524 | 0.003 |       |
|                          | 8bCS-8bComalSpring | 11 | 2 | 342 - 382 | 1.000 | 0.524 | 0.003 |       |
| <b>GA-III49A<br/>NEU</b> | Co101              | 5  | 3 | 394 - 412 | 1.000 | 0.644 | 0.174 | 0.181 |
| <b>Genbank#</b>          | 3VI/17             | 11 | 2 | 394 - 408 | 1.000 | 0.524 | 0.003 |       |
| AJ810461                 | 4III/9             | 12 | 2 | 394 - 408 | 0.917 | 0.518 | 0.014 |       |
|                          | W5-Weslaco         | 7  | 2 | 394 - 414 | 1.000 | 0.538 | 0.037 |       |
|                          | 6SI-SanIgnacio     | 5  | 2 | 394 - 408 | 1.000 | 0.556 | 0.127 |       |
|                          | 7aCS-7aComalSpring | 11 | 2 | 394 - 408 | 1.000 | 0.524 | 0.003 |       |
|                          | 8bCS-8bComalSpring | 11 | 2 | 394 - 408 | 1.000 | 0.524 | 0.003 |       |

**Table S2. Characteristics of the 12 microsatellites.** Here, summary statistics of the 12 microsatellites that were used in differentiating the 7 different clonal lineages of *P. formosa* are shown, i.e., population, sample size, the number of alleles, the observed heterozygosity of the current generation ( $H_0$ ), the expected heterozygosity ( $H_E$ ), the probability of Hardy-Weinberg-Equilibrium (HWE), i.e.,  $H_0 = H_E$  (P), and the  $F_{ST}$  value of all populations at that particular locus. Note that loci are generally expected not to be in HWE in Amazon mollies, due to the lack of sexual recombination.

**Table S3.**

|                                | <b>Co101</b> | <b>3VI/17</b> | <b>4III/9</b> | <b>W5-<br/>Weslaco</b> | <b>6SI-<br/>SanIgnacio</b> | <b>7aCS-<br/>7aComalSpring</b> | <b>8bCS-<br/>8bComalSpring</b> |
|--------------------------------|--------------|---------------|---------------|------------------------|----------------------------|--------------------------------|--------------------------------|
| <b>Co101</b>                   | -            | 0.148**       | 0.157**       | 0.248**                | 0.000                      | 0.000                          | 0.000                          |
| <b>3VI/17</b>                  | 0.00040**    | -             | 0.000         | 0.251***               | 0.210**                    | 0.232***                       | 0.244***                       |
| <b>4III/9</b>                  | 0.00060**    | 1.00000       | -             | 0.258***               | 0.221**                    | 0.241***                       | 0.253***                       |
| <b>W5-Weslaco</b>              | 0.00085**    | <0.00001***   | <0.00001***   | -                      | 0.298**                    | 0.318***                       | 0.320***                       |
| <b>6SI-SanIgnacio</b>          | 0.00970*     | <0.00001***   | <0.00001***   | <0.00001***            | -                          | 0.000                          | 0.000                          |
| <b>7aCS-<br/>7aComalSpring</b> | 0.00045**    | <0.00001***   | <0.00001***   | <0.00001***            | 1.00000                    | -                              | 0.006***                       |
| <b>8bCS-<br/>8bComalSpring</b> | 0.39495      | <0.00001***   | <0.00001***   | <0.00001***            | 0.00035**                  | <0.00001***                    | -                              |

**Table S3. Genetic divergence.** Genetic divergence among the 7 clonal lineages of *P. formosa*.

Above the diagonal are the  $F_{ST}$  values and below the diagonal are the  $P$ -values from the Markov Chain Monte Carlo exact test. Statistical significance after sequential Bonferroni correction for multiple pairwise comparisons is indicated at an experiment-wise error rate  $\alpha$  (\* $\alpha=0.05$ ;

\*\* $\alpha=0.01$ ; \*\*\*  $\alpha=0.001$ ).

**Table S4.**

|                 | C101 | VI/17 | III/9 | Weslaco | San Ignacio | Comal Spring 7a | Comal Spring 8b |
|-----------------|------|-------|-------|---------|-------------|-----------------|-----------------|
| C101            | -    | 654.1 | 653.9 | 415.5   | 573         | 28.1            | 28.1            |
| VI/17           | 6    | -     | 22.51 | 249.8   | 100.4       | 635             | 635             |
| III/9           | 6    | 1     | -     | 255.4   | 90          | 634.1           | 634.1           |
| Weslaco         | 8    | 6     | 6     | -       | 196.2       | 399.8           | 399.8           |
| San Ignacio     | 4    | 4     | 4     | 6       | -           | 552.8           | 552.8           |
| Comal Spring 7a | 4    | 4     | 4     | 6       | 0           | -               | 0               |
| Comal Spring 8b | 3    | 5     | 5     | 7       | 2           | 2               | -               |

**Table S4. Loci difference and geographic range.** This table shows the geographical distance (km) between the 7 different clonal lineages above the diagonal. Below the diagonal are the number of loci that are different in their allelic pattern between the different clonal lineages. Interestingly, the San Ignacio clonal lineages is located 552.8 km south of Comal Spring, yet the Comal Spring 7a lineage is identical to the San Ignacio lineage (for the 12 microsatellites that we tested them for) and not to a sympatric clonal lineage Comal Spring 8b.

**Table S5.**

|                 | C101  | VI/17 | III/9 | Weslaco | San Ignacio | Comal Spring 7a | Comal Spring 8b |
|-----------------|-------|-------|-------|---------|-------------|-----------------|-----------------|
| C101            | 0.825 | 0.772 | 0.772 | 0.650   | 0.892       | 0.892           | 0.906           |
| VI/17           |       | 0.992 | 0.989 | 0.750   | 0.791       | 0.791           | 0.750           |
| III/9           |       |       | 0.997 | 0.708   | 0.788       | 0.788           | 0.747           |
| Weslaco         |       |       |       | 1.000   | 0.667       | 0.667           | 0.625           |
| San Ignacio     |       |       |       |         | 1.000       | 1.000           | 0.951           |
| Comal Spring 7a |       |       |       |         |             | 1.000           | 0.951           |
| Comal Spring 8b |       |       |       |         |             |                 | 0.986           |

**Table S5. Genetic Identity.** The genetic identity (28) within each clonal lineage is higher (i.e., more closely related among each other; 1.000= 100% genetically identical within clonal lineage) than between clonal lineages, with exception of C101. The lack of higher genetic identity with the C101 clonal lineage may be reflected in the lack of behavioural evidence for kin recognition in this clonal lineage.

**Table S6.**

|                 | C101  | VI/17  | III/9  | Weslaco | San Ignacio | Comal Spring 7a | Comal Spring 8b |
|-----------------|-------|--------|--------|---------|-------------|-----------------|-----------------|
| C101            | 0.115 | -0.153 | -0.153 | -0.77   | 0.454       | 0.454           | 0.525           |
| VI/17           |       | 0.960  | 0.944  | -0.264  | -0.057      | -0.057          | -0.264          |
| III/9           |       |        | 0.985  | -0.477  | -0.072      | -0.072          | -0.279          |
| Weslaco         |       |        |        | 1.000   | -0.684      | -0.684          | -0.896          |
| San Ignacio     |       |        |        |         | 1.000       | 1.000           | 0.752           |
| Comal Spring 7a |       |        |        |         |             | 1.000           | 0.752           |
| Comal Spring 8b |       |        |        |         |             |                 | 0.929           |

**Table S6. Relatedness Coefficient.** The coefficient of relatedness (27) within each clonal lineage is higher than between clonal lineages, with exception of C101. R=1: identical twins/clones; R=0.5: clonal populations as related to each other as full siblings would be in an outcrossing, sexual species; and R<0: less identity than at random (i.e., individuals are as dissimilar to each other as unrelated individuals would be in outcrossing, sexual species with the lower numbers indicating the more unlikely related the lineages are). Note: the underlying logic of R is assuming sexual reproduction of diploid organisms, and therefore, these values are only considered an approximation in clonal organisms.
